# Supplementary material
Source: publisher figshare collection journal article supplement (https://acs.figshare.com/ndownloader/files/5116537)
Supplement: Supplementary file 1 [file 5116537]

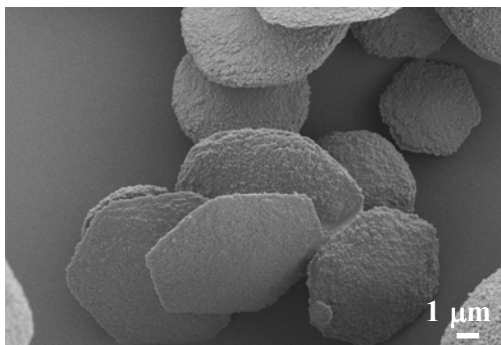

ESI 1: SEM image showing hexagonal-shaped crystals of vaterite from a 0.2 M  $\text{CaCl}_2$  sample aged 18 hours.
